# Supplementary material for: A novel prognostic gene set for colon adenocarcinoma relative to the tumor microenvironment, chemotherapy, and immune therapy
Source: Front Genet. 2023 Jan 9;13:975404. doi: 10.3389/fgene.2022.975404 (PMC9868701; doi:10.3389/fgene.2022.975404)
Supplement: Supplementary file 2 [file Table2.XLSX]

## Sheet: gse
GSE39582
	Mean of the risk score			Mean of the risk score			Mean of the risk score
T1	0.103803		M0	0.149806		N0	0.14477
T2	0.11096		M1	0.195878		N1	0.153085
T3	0.148691					N2	0.183721
T4	0.193248					N3	0.17548
TCGA
	Mean of the risk score			Mean of the risk score			Mean of the risk score
T1	0.104009		M0	0.434321		N0	0.527004
T2	0.230203		M1	2.09492		N1	0.25849
T3	0.493668					N2	1.6295
T4	2.37641
