# Supplementary material for: A novel prognostic gene set for colon adenocarcinoma relative to the tumor microenvironment, chemotherapy, and immune therapy
Source: Front Genet. 2023 Jan 9;13:975404. doi: 10.3389/fgene.2022.975404 (PMC9868701; doi:10.3389/fgene.2022.975404)
Supplement: Supplementary file 7 [file Table1.XLSX]

## Sheet: Sheet1
	type	full name	function	Reference
ATOH1	protein coding	atonal bHLH transcription factor 1	Regulates intestinal stem cell fate and differentiation	Lindemans CA, Calafiore M, Mertelsmann AM, et al. Interleukin-22 promotes intestinal-stem-cell-mediated epithelial regeneration. Nature. 2015;528(7583):560-564. doi:10.1038/nature16460	Gao Y, Yan Y, Tripathi S, et al. LKB1 Represses ATOH1 via PDK4 and Energy Metabolism and Regulates Intestinal Stem Cell Fate. Gastroenterology. 2020;158(5):1389-1401.e10. doi:10.1053/j.gastro.2019.12.033	Gracz AD, Samsa LA, Fordham MJ, et al. Sox4 Promotes Atoh1-Independent Intestinal Secretory Differentiation Toward Tuft and Enteroendocrine Fates. Gastroenterology. 2018;155(5):1508-1523.e10. doi:10.1053/j.gastro.2018.07.023
C4orf47	protein coding	chromosome 4 open reading frame 47	components of the centrosome	Firat-Karalar EN, Sante J, Elliott S, Stearns T. Proteomic analysis of mammalian sperm cells identifies new components of the centrosome. J Cell Sci. 2014;127(Pt 19):4128-4133. doi:10.1242/jcs.157008
CPA4	protein coding	carboxypeptidase A4	regulates cell growth, stemness, drug resistance and immune evasion	Hong W, Xue M, Jiang J, Zhang Y, Gao X. Circular RNA circ-CPA4/ let-7 miRNA/PD-L1 axis regulates cell growth, stemness, drug resistance and immune evasion in non-small cell lung cancer (NSCLC). J Exp Clin Cancer Res. 2020;39(1):149. Published 2020 Aug 3. doi:10.1186/s13046-020-01648-1	Zhang H, Hao C, Wang H, Shang H, Li Z. Carboxypeptidase A4 promotes proliferation and stem cell characteristics of hepatocellular carcinoma. Int J Exp Pathol. 2019;100(2):133-138. doi:10.1111/iep.12315
DNASE1L1	protein coding	deoxyribonuclease 1 like 1	uveal melanoma.lung adenocarcinoma.head and neck cancer,function unknown	Xie X, Zheng X, Xie T, Cai J, Yao Y. Identification of prognostic alternative splicing signatures in uveal melanoma. Int Ophthalmol. 2021;41(4):1347-1362. doi:10.1007/s10792-021-01699-z	Liang Y, Song J, He D, et al. Systematic analysis of survival-associated alternative splicing signatures uncovers prognostic predictors for head and neck cancer [published online ahead of print, 2019 Feb 10]. J Cell Physiol. 2019;234(9):15836-15846. doi:10.1002/jcp.28241	Wang R, Zhu H, Yang M, Zhu C. DNA methylation profiling analysis identifies a DNA methylation signature for predicting prognosis and recurrence of lung adenocarcinoma. Oncol Lett. 2019;18(6):5831-5842. doi:10.3892/ol.2019.10931
ERFE	protein coding	erythroferrone	inhibits hepcidin expression	Castro-Mollo M, Gera S, Ruiz-Martinez M, et al. The hepcidin regulator erythroferrone is a new member of the erythropoiesis-iron-bone circuitry. Elife. 2021;10:e68217. Published 2021 May 18. doi:10.7554/eLife.68217
F2RL2	protein coding	coagulation factor II thrombin receptor like 2	associated with development of preneoplastic foci,stemness-related genes	Lupu DS, Orozco LD, Wang Y, Cullen JM, Pellegrini M, Zeisel SH. Altered methylation of specific DNA loci in the liver of Bhmt-null mice results in repression of Iqgap2 and F2rl2 and is associated with development of preneoplastic foci. FASEB J. 2017;31(5):2090-2103. doi:10.1096/fj.201601169R
FBXO39	protein coding	F-box protein 39	Substrate-recognition component of the SCF (SKP1-CUL1-F-box protein)-type E3 ubiquitin ligase complex,correlates with tumor progression in cervical squamous cell carcinoma and colon cancer	Yang Y, Zhao Y, Sun G, et al. FBXO39 predicts poor prognosis and correlates with tumor progression in cervical squamous cell carcinoma [published online ahead of print, 2022 Aug 28]. Pathol Res Pract. 2022;238:154090. doi:10.1016/j.prp.2022.154090	Ramadan RA, Morsy H, Samir M, Shamseya M, Shalaby M, El-Attar EA. Significance of cancer testis-associated antigens (SPAG9 and FBXO39) in colon cancer [published online ahead of print, 2021 May 11]. Indian J Cancer. 2021;10.4103/ijc.IJC_873_19. doi:10.4103/ijc.IJC_873_19
FZD3	protein coding	Frizzled class receptor 3	Promote growth and metastasis of tumor independently of canonical WNT signaling	Li C, Nguyen V, Clark KN, et al. Down-regulation of FZD3 receptor suppresses growth and metastasis of human melanoma independently of canonical WNT signaling. Proc Natl Acad Sci U S A. 2019;116(10):4548-4557. doi:10.1073/pnas.1813802116	Mo D, Jiang P, Yang Y, et al. A tRNA fragment, 5'-tiRNAVal, suppresses the Wnt/β-catenin signaling pathway by targeting FZD3 in breast cancer. Cancer Lett. 2019;457:60-73. doi:10.1016/j.canlet.2019.05.007	Lu D, Zhao Y, Tawatao R, et al. Activation of the Wnt signaling pathway in chronic lymphocytic leukemia. Proc Natl Acad Sci U S A. 2004;101(9):3118-3123. doi:10.1073/pnas.0308648100
HPCAL4	protein coding	Hippocalcin like 4	Involved in the calcium-dependent regulation of rhodopsin phosphorylation and genomic amplification	Henderson LJ, Coe BP, Lee EH, et al. Genomic and gene expression profiling of minute alterations of chromosome arm 1p in small-cell lung carcinoma cells. Br J Cancer. 2005;92(8):1553-1560. doi:10.1038/sj.bjc.6602452	Liu R, Chen Z, Wang S, et al. Screening of key genes associated with R‑CHOP immunochemotherapy and construction of a prognostic risk model in diffuse large B‑cell lymphoma. Mol Med Rep. 2019;20(4):3679-3690. doi:10.3892/mmr.2019.10627
ICOS	protein coding	Inducible T cell costimulator	Indicator of T-cell-Mediated Response to Cancer Immunotherapy	Xiao Z, Mayer AT, Nobashi TW, Gambhir SS. ICOS Is an Indicator of T-cell-Mediated Response to Cancer Immunotherapy. Cancer Res. 2020;80(14):3023-3032. doi:10.1158/0008-5472.CAN-19-3265	Li DY, Xiong XZ. ICOS+ Tregs: A Functional Subset of Tregs in Immune Diseases [published correction appears in Front Immunol. 2021 May 12;12:701515]. Front Immunol. 2020;11:2104. Published 2020 Aug 28. doi:10.3389/fimmu.2020.02104	Amatore F, Gorvel L, Olive D. Role of Inducible Co-Stimulator (ICOS) in cancer immunotherapy. Expert Opin Biol Ther. 2020;20(2):141-150. doi:10.1080/14712598.2020.1693540	Kraehenbuehl L, Weng CH, Eghbali S, Wolchok JD, Merghoub T. Enhancing immunotherapy in cancer by targeting emerging immunomodulatory pathways. Nat Rev Clin Oncol. 2022;19(1):37-50. doi:10.1038/s41571-021-00552-7
INHBB	protein coding	Inhibin subunit beta B	TGFβ pathway activators and relative with immune infiltrates in gastric cancer.	Radeke MJ, Radeke CM, Shih YH, et al. Restoration of mesenchymal retinal pigmented epithelial cells by TGFβ pathway inhibitors: implications for age-related macular degeneration. Genome Med. 2015;7(1):58. Published 2015 Jun 19. doi:10.1186/s13073-015-0183-x	Yu W, He G, Zhang W, Ye Z, Zhong Z, Huang S. INHBB is a novel prognostic biomarker and correlated with immune infiltrates in gastric cancer. Front Genet. 2022;13:933862. Published 2022 Sep 2. doi:10.3389/fgene.2022.933862
ITLN1	protein coding	Intelectin 1	Modulates invasive potential and metabolic reprogramming of tumor	Au-Yeung CL, Yeung TL, Achreja A, et al. ITLN1 modulates invasive potential and metabolic reprogramming of ovarian cancer cells in omental microenvironment. Nat Commun. 2020;11(1):3546. Published 2020 Jul 15. doi:10.1038/s41467-020-17383-2	Li D, Mei H, Pu J, et al. Intelectin 1 suppresses the growth, invasion and metastasis of neuroblastoma cells through up-regulation of N-myc downstream regulated gene 2. Mol Cancer. 2015;14:47. Published 2015 Feb 21. doi:10.1186/s12943-015-0320-6
KIF7	protein coding	kinesin family member 7	Relative with cancer drug resistance	Jenks AD, Vyse S, Wong JP, et al. Primary Cilia Mediate Diverse Kinase Inhibitor Resistance Mechanisms in Cancer. Cell Rep. 2018;23(10):3042-3055. doi:10.1016/j.celrep.2018.05.016
KLHL26	protein coding	kelch like family member 26	have an important role in ubiquitin-mediated protein degradation	Samudrala SSK, North LM, Stamm KD, et al. Novel KLHL26 variant associated with a familial case of Ebstein's anomaly and left ventricular noncompaction. Mol Genet Genomic Med. 2020;8(4):e1152. doi:10.1002/mgg3.1152
LINC00629	ncRNA	long intergenic non-protein coding RNA 629	Relative with progression,migration and invasion of tumor	Li J, Wang L, He F, Li B, Han R. Long noncoding RNA LINC00629 restrains the progression of gastric cancer by upregulating AQP4 through competitively binding to miR-196b-5p. J Cell Physiol. 2020;235(3):2973-2985. doi:10.1002/jcp.29203	Muys BR, Lorenzi JC, Zanette DL, et al. Placenta-Enriched LincRNAs MIR503HG and LINC00629 Decrease Migration and Invasion Potential of JEG-3 Cell Line. PLoS One. 2016;11(3):e0151560. Published 2016 Mar 29. doi:10.1371/journal.pone.0151560	Li R, Zhang L, Qin Z, et al. High LINC00536 expression promotes tumor progression and poor prognosis in bladder cancer. Exp Cell Res. 2019;378(1):32-40. doi:10.1016/j.yexcr.2019.03.009
LRRC29	protein coding	leucine rich repeat containing 29	function unknown,one research in breast cancer	van Wezel T, Lombaerts M, van Roon EH, et al. Expression analysis of candidate breast tumour suppressor genes on chromosome 16q. Breast Cancer Res. 2005;7(6):R998-R1004. doi:10.1186/bcr1337
MMP12	protein coding	matrix metallopeptidase 12	related to immune cell infiltration in tumor	Liu Y, Cheng L, Li C, Zhang C, Wang L, Zhang J. Identification of tumor microenvironment-related prognostic genes in colorectal cancer based on bioinformatic methods. Sci Rep. 2021;11(1):15040. Published 2021 Jul 22. doi:10.1038/s41598-021-94541-6	Chang WJ, Du Y, Zhao X, Ma LY, Cao GW. Inflammation-related factors predicting prognosis of gastric cancer. World J Gastroenterol. 2014;20(16):4586-4596. doi:10.3748/wjg.v20.i16.4586
MYL6B	protein coding	myosin light chain 6B	Promote MDM2-mediated p53 degradation,	Xie X, Wang X, Liao W, et al. MYL6B, a myosin light chain, promotes MDM2-mediated p53 degradation and drives HCC development. J Exp Clin Cancer Res. 2018;37(1):28. Published 2018 Feb 13. doi:10.1186/s13046-018-0693-7	Zhu J, Tang B, Gao Y, et al. Predictive Models for HCC Prognosis, Recurrence Risk, and Immune Infiltration Based on Two Exosomal Genes: MYL6B and THOC2. J Inflamm Res. 2021;14:4089-4109. Published 2021 Aug 24. doi:10.2147/JIR.S315957
NPM3	protein coding	nucleophosmin/nucleoplasmin 3	Regulated of diverse cellular processes such as ribosome biogenesis, chromatin remodeling or protein chaperoning	Okuwaki M, Sumi A, Hisaoka M, et al. Function of homo- and hetero-oligomers of human nucleoplasmin/nucleophosmin family proteins NPM1, NPM2 and NPM3 during sperm chromatin remodeling. Nucleic Acids Res. 2012;40(11):4861-4878. doi:10.1093/nar/gks162	Gadad SS, Shandilya J, Kishore AH, Kundu TK. NPM3, a member of the nucleophosmin/nucleoplasmin family, enhances activator-dependent transcription. Biochemistry. 2010;49(7):1355-1357. doi:10.1021/bi9021632
PCBD1	protein coding	pterin-4 alpha-carbinolamine dehydratase 1	acts as a coactivator for HNF1B-dependent transcription,exert different effects on HNF1β-mediated transcription	Tholen LE, Bos C, Jansen PWTC, et al. Bifunctional protein PCBD2 operates as a co-factor for hepatocyte nuclear factor 1β and modulates gene transcription. FASEB J. 2021;35(4):e21366. doi:10.1096/fj.202002022R	Ferrè S, de Baaij JH, Ferreira P, et al. Mutations in PCBD1 cause hypomagnesemia and renal magnesium wasting. J Am Soc Nephrol. 2014;25(3):574-586. doi:10.1681/ASN.2013040337
PLEC	protein coding	plectin	Enhances metastatic and cancer cell invasion	Fish L, Khoroshkin M, Navickas A, et al. A prometastatic splicing program regulated by SNRPA1 interactions with structured RNA elements. Science. 2021;372(6543):eabc7531. doi:10.1126/science.abc7531
POLR2F	protein coding	RNA polymerase II, I and III subunit F	DNA-dependent RNA polymerases catalyze the transcription of DNA into RNA using the four ribonucleoside triphosphates as substrates.	Jia Z, Ai X, Sun F, Zang T, Guan Y, Gao F. Identification of new hub genes associated with bladder carcinoma via bioinformatics analysis. Tumori. 2015;101(1):117-122. doi:10.5301/tj.5000196
POU5F1P4	pseudo	POU class 5 homeobox 1 pseudogene 4	Increase the sensitivity of colorectal cancer cells to cetuximab	Peng K, Liu R, Yu Y, et al. Identification and validation of cetuximab resistance associated long noncoding RNA biomarkers in metastatic colorectal cancer. Biomed Pharmacother. 2018;97:1138-1146. doi:10.1016/j.biopha.2017.11.031
PRRX2	protein coding	paired related homeobox 2	Promote tumor metastasis via activation of Wnt/β-catenin signaling pathway	Chai WX, Sun LG, Dai FH, Shao HS, Zheng NG, Cai HY. Inhibition of PRRX2 suppressed colon cancer liver metastasis via inactivation of Wnt/β-catenin signaling pathway. Pathol Res Pract. 2019;215(10):152593. doi:10.1016/j.prp.2019.152593	Lv ZD, Wang HB, Liu XP, et al. Silencing of Prrx2 Inhibits the Invasion and Metastasis of Breast Cancer both In Vitro and In Vivo by Reversing Epithelial-Mesenchymal Transition. Cell Physiol Biochem. 2017;42(5):1847-1856. doi:10.1159/000479542
PTPRU	protein coding	protein tyrosine phosphatase receptor type U	Inhibits Cancer Stemness By Attenuating Hippo/YAP Signaling Pathway	Gu J, Zhang Z, Lang T, et al. PTPRU, As A Tumor Suppressor, Inhibits Cancer Stemness By Attenuating Hippo/YAP Signaling Pathway. Onco Targets Ther. 2019;12:8095-8104. Published 2019 Oct 4. doi:10.2147/OTT.S218125	Zhou R, Zhou X, Yin Z, et al. MicroRNA-574-5p promotes metastasis of non-small cell lung cancer by targeting PTPRU. Sci Rep. 2016;6:35714. Published 2016 Oct 20. doi:10.1038/srep35714
PTTG3P	pseudo	pituitary tumor-transforming 3, pseudogene	Promote Metastasis of tumor	Liu N, Dou L, Zhang X. LncRNA PTTG3P Sponge Absorbs microRNA-155-5P to Promote Metastasis of Colorectal Cancer. Onco Targets Ther. 2020;13:5283-5291. Published 2020 Jun 9. doi:10.2147/OTT.S248457	Liu W, Tang J, Zhang H, et al. A novel lncRNA PTTG3P/miR-132/212-3p/FoxM1 feedback loop facilitates tumorigenesis and metastasis of pancreatic cancer. Cell Death Discov. 2020;6(1):136. Published 2020 Nov 30. doi:10.1038/s41420-020-00360-5	Huang JL, Cao SW, Ou QS, et al. The long non-coding RNA PTTG3P promotes cell growth and metastasis via up-regulating PTTG1 and activating PI3K/AKT signaling in hepatocellular carcinoma. Mol Cancer. 2018;17(1):93. Published 2018 May 26. doi:10.1186/s12943-018-0841-x	Guo XC, Li L, Gao ZH, Zhou HW, Li J, Wang QQ. The long non-coding RNA PTTG3P promotes growth and metastasis of cervical cancer through PTTG1. Aging (Albany NY). 2019;11(5):1333-1341. doi:10.18632/aging.101830
RNF112	protein coding	Ring finger protein 112	Induce cell cycle arrest at the G0/G1 phase through up-regulation of cell-cycle regulatory proteins	Lee KH, Chen CL, Lee YC, et al. Znf179 induces differentiation and growth arrest of human primary glioblastoma multiforme in a p53-dependent cell cycle pathway [published correction appears in Sci Rep. 2018 Sep 3;8(1):13375]. Sci Rep. 2017;7(1):4787. Published 2017 Jul 6. doi:10.1038/s41598-017-05305-0
SERPINB7	protein coding	Serpin family B member 7	Suppress the invasion and migration of tumor	Chou RH, Wen HC, Liang WG, et al. Suppression of the invasion and migration of cancer cells by SERPINB family genes and their derived peptides. Oncol Rep. 2012;27(1):238-245. doi:10.3892/or.2011.1497
SLCO1A2	protein coding	Solute carrier organic anion transporter family member 1A2	Affect imatinib pharmacokinetics	Yamakawa Y, Hamada A, Shuto T, et al. Pharmacokinetic impact of SLCO1A2 polymorphisms on imatinib disposition in patients with chronic myeloid leukemia. Clin Pharmacol Ther. 2011;90(1):157-163. doi:10.1038/clpt.2011.102
TH	protein coding	Tyrosine hydroxylase	Uses tetrahydrobiopterin and molecular oxygen to convert tyrosine to L-Dopa	Roma J, Saus E, Cuadros M, Reventós J, Sánchez de Toledo J, Gallego S. Characterisation of novel splicing variants of the tyrosine hydroxylase C-terminal domain in human neuroblastic tumours. Biol Chem. 2007;388(4):419-426. doi:10.1515/BC.2007.041
TMEM39B	protein coding	Transmembrane protein 39B	Influence the infiltration of regulatory T cells	Berger AH, Bratland E, Sjøgren T, et al. Transcriptional Changes in Regulatory T Cells From Patients With Autoimmune Polyendocrine Syndrome Type 1 Suggest Functional Impairment of Lipid Metabolism and Gut Homing. Front Immunol. 2021;12:722860. Published 2021 Aug 30. doi:10.3389/fimmu.2021.722860
TRDV3	other	T cell receptor delta variable 3	Upon antigen recognition induces rapid, innate-like immune responses involved in pathogen clearance and tissue repair	Nielsen MM, Witherden DA, Havran WL. γδ T cells in homeostasis and host defence of epithelial barrier tissues. Nat Rev Immunol. 2017;17(12):733-745. doi:10.1038/nri.2017.101	Vantourout P, Hayday A. Six-of-the-best: unique contributions of γδ T cells to immunology. Nat Rev Immunol. 2013;13(2):88-100. doi:10.1038/nri3384
ZDHHC1	protein coding	zinc finger DHHC-type containing 1	Has also a palmitoyltransferase activity-independent function in DNA virus-triggered and CGAS-mediated innate immune response	Zhou Q, Lin H, Wang S, et al. The ER-associated protein ZDHHC1 is a positive regulator of DNA virus-triggered, MITA/STING-dependent innate immune signaling. Cell Host Microbe. 2014;16(4):450-461. doi:10.1016/j.chom.2014.09.006
		3.8e-13
